# Supplementary material for: Color switching in V3O7·H2O films cycled in Li and Na based electrolytes: novel vanadium oxide based electrochromic materials
Source: Royal Society of Chemistry journal article supplement (doi:10.1039/c9tc06753a), 2020-01-01
Supplement: c9tc06753a1.pdf [file c9tc06753a1.pdf]

ARTICLE

## Color Switch in $V_3O_7 \cdot H_2O$ cycled in Li and Na based electrolytes: novel vanadium oxide based electrochromic material

Received 00th January 20xx,  
Accepted 00th January 20xx

Issam MJEJRI and Aline ROUGIER\*

DOI: 10.1039/x0xx00000x

1 **Table S1.** Variation of crystallite size of the various powders.

| Powders synthesized at different molar ratio | Crystallite size (nm) |
|----------------------------------------------|-----------------------|
| (a) 1:1                                      | 174                   |
| (b) 0.9:1                                    | 155                   |
| (c) 0.7:1                                    | 149                   |
| (d) 0.5:1                                    | 131                   |
| (e) 0.4:1                                    | 141                   |
| (f) 0.3:1                                    | 90                    |
| (g) 0.2:1                                    | 78                    |
| (h) 0.1:1                                    | 75                    |
| (i) 0.05:1                                   | 70                    |

$VO_2$   
(Peaks used for Scherrer's formula (001) (200) (110) (002))

$V_3O_7 \cdot H_2O$   
(Peaks used for Scherrer's formula (200) (310) (320) (221))

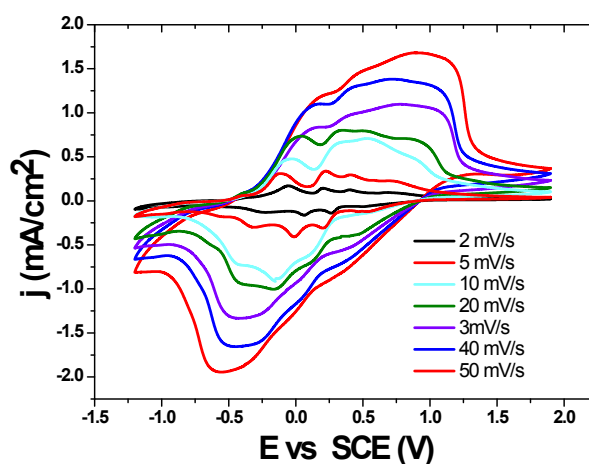

CNRS, ICMCB-UMR 5026, F-33600 Pessac Université de Bordeaux, ICMCB-UMR 5026, F-33600 Pessac, France.

• Corresponding author : [aline.rougier@icmcb.cnrs.fr](mailto:aline.rougier@icmcb.cnrs.fr)

Electronic Supplementary Information (ESI) available: [details of any supplementary information available should be included here]. See DOI: 10.1039/x0xx00000x

**Figure S1.** cyclic Voltammetry of  $V_3O_7 \cdot H_2O$ /LiTFSI-EMITFSI/Pt at different scan rates.
